# Supplementary material for: The joint effect of energy reduction with calcium supplementation on the risk factors of type 2 diabetes in the overweight population: a two-year randomized controlled trial
Source: publisher site journal article supplement (doi:10.18632/aging.202485), 2021-02-11
Supplement: Supplementary file [file aging-v13i4-202485-supplementary-material-SD1.pdf]

## SUPPLEMENTARY TABLE

**Supplementary Table 1. Changes of dietary patterns in ERGs and NERGs.**

| Variables          | ERGs       |            |         | NERGs      |            |         |
|--------------------|------------|------------|---------|------------|------------|---------|
|                    | Baseline   | Follow-up  | P-value | Baseline   | Follow-up  | P-value |
| Rice (g/d)         | 225 (165)  | 175 (110)  | <0.001  | 215 (130)  | 225 (100)  | 0.053   |
| Wheat (g/d)        | 150 (120)  | 125 (80)   | <0.001  | 140 (110)  | 165 (95)   | <0.001  |
| Potato (g/d)       | 55 (60)    | 50 (50)    | 0.009   | 70 (95)    | 75 (90)    | <0.001  |
| Beans (g/d)        | 55 (65)    | 50 (55)    | 0.033   | 50 (60)    | 55 (55)    | 0.032   |
| Vegetable (g/d)    | 280 (255)  | 300 (245)  | <0.001  | 240 (130)  | 260 (210)  | 0.079   |
| Fruit (g/d)        | 145 (155)  | 175 (145)  | <0.001  | 125 (80)   | 135 (130)  | 0.090   |
| Livestock (g/d)    | 80 (80)    | 40 (45)    | <0.001  | 90 (90)    | 95 (90)    | <0.001  |
| Poultry (g /d)     | 30 (55)    | 25 (35)    | <0.001  | 35 (50)    | 40 (55)    | <0.001  |
| Eggs (per d)       | 1.0 (1.4)  | 0.8 (0.6)  | 0.006   | 0.9 (0.8)  | 0.8 (0.6)  | 0.223   |
| Milk (g/d)         | 100 (115)  | 55 (50)    | <0.001  | 85 (95)    | 80 (75)    | 0.220   |
| Fish (g /d)        | 35 (30)    | 25 (20)    | 0.103   | 30 (50)    | 40 (65)    | 0.004   |
| Snack (g /d)       | 15 (30)    | 10 (20)    | 0.010   | 15 (35)    | 10 (15)    | 0.013   |
| Energy (kcal/d)    | 2165 (984) | 1673 (650) | <0.001  | 2076 (774) | 2182 (666) | <0.001  |
| Carbohydrate (g/d) | 376 (169)  | 308 (103)  | <0.001  | 366 (128)  | 375 (100)  | <0.001  |
| Protein (g/d)      | 76 (44)    | 54 (36)    | <0.001  | 74 (34)    | 77 (33)    | 0.453   |
| Lipid (g/d)        | 40 (28)    | 25 (20)    | <0.001  | 41 (27)    | 41 (25)    | 0.932   |

Note: Data are presented as mean (Standard deviation).
